# Supplementary material for: Rapid Antibacterial Activity Assessment of Chimeric Lysins
Source: MDPI journal article supplement (doi:10.3390/ijms25042430), 2024-02-19
Supplement: s1 [file s1]

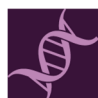

Supplementary Information

# Rapid Antibacterial Activity Assessment of Chimeric Lysins

Jin-Mi Park <sup>1,2,3</sup>, Jun-Hyun Kim <sup>1,2,3</sup>, Gun Kim <sup>2,4</sup>, Hun-Ju Sim <sup>2,4</sup>, Sun-Min Ahn <sup>1</sup>, Kang-Seuk Choi <sup>2,5,\*</sup>  
and Hyuk-Joon Kwon <sup>1,2,3,\*</sup>

<sup>1</sup> Laboratory of Poultry Medicine, College of Veterinary Medicine, Seoul National University, Seoul 08826, Republic of Korea; niji17@snu.ac.kr (J.-M.P.); loupgarouhs@snu.ac.kr (J.-H.K.); vicky.ahn@snu.ac.kr (S.-M.A.)

<sup>2</sup> College of Veterinary Medicine and BK21 for Veterinary Science, Seoul National University, Seoul 08826, Republic of Korea; smiles@ss@snu.ac.kr (G.K.); gjswn0302@snu.ac.kr (H.-J.S.)

<sup>3</sup> GeNiner Inc., Seoul 08826, Republic of Korea

<sup>4</sup> Laboratory of Pharmacology, Research Institute for Veterinary Science, College of Veterinary Medicine, Seoul National University, Seoul 08826, Republic of Korea

<sup>5</sup> Laboratory of Avian Diseases, College of Veterinary Medicine, Seoul National University, Seoul 08826, Republic of Korea

\* Correspondence: kchoi0608@snu.ac.kr (K.-S.C.); kwonhj01@snu.ac.kr (H.-J.K.);  
Tel.: +82-2-880-1266 (K.-S.C. & H.-J.K.)

**Table S1.** Information of SH3 domains used in this study.

| Abbreviated name       | Sequence identity to K <sub>SH3</sub> (%) | Genbank Protein Full name                                                        | Genbank accession No. | Amino acid Region | Amino acid Length |
|------------------------|-------------------------------------------|----------------------------------------------------------------------------------|-----------------------|-------------------|-------------------|
| L25(K <sub>SH3</sub> ) | 100                                       | LysK<br>[ <i>Staphylococcus phage</i> P4W]                                       | AFN38929              | 409-495           | 87                |
| ClyC <sub>SH3</sub>    | 94.2                                      | Lysin<br>[ <i>Staphylococcus phage</i> PALS_1]                                   | QDJ97474.1            | 123-209           | 87                |
| vB <sub>SH3</sub>      | 93.1                                      | N-acetylmuramoyl-L-alanine amidase<br>[ <i>Staphylococcus phage</i> vB_Sau_Clo6] | ARM69344.1            | 409-495           | 87                |
| tras14 <sub>SH3</sub>  | 40.2                                      | endolysin<br>[ <i>Staphylococcus phage</i> trsa14]                               | AWH13066.1            | 395-481           | 87                |
| ClyO <sub>SH3</sub>    | 11.4                                      | PlySs2 family phage lysin<br>[ <i>Streptococcus suis</i> ]                       | WP_024417665.1        | 162-245           | 84                |
| Lsp <sub>SH3</sub>     | 9.1                                       | Lysostaphin<br>[ <i>Staphylococcus simulans</i> ]                                | WP_013012297.1        | 369-452           | 84                |
| 2638A <sub>SH3</sub>   | 6.8                                       | endolysin<br>[ <i>Staphylococcus phage</i> 2638A]                                | YP_239818.1           | 401-486           | 86                |
| 2958 <sub>SH3</sub>    | 4.5                                       | endolysin<br>[ <i>Staphylococcus phage</i> phi2958PVL]                           | YP_002268027.1        | 405-484           | 80                |

**Table S2.** Information of lysostaphin and chimeric lysins used in this study.

| Protein name | Genbank<br>accession No. | Amino acid<br>Region | Amino<br>acid<br>Length | Reference |
|--------------|--------------------------|----------------------|-------------------------|-----------|
| Lysostaphin  | WP_013012297.1           | 207-452              | 246                     | [34]      |
| Lsp          |                          | 207-368              | 162                     |           |
| ClyC         | AGO49867.1               | 1-171                | 171                     | [24]      |
|              | InsertVD                 | 172-173              | 2                       |           |
|              | QDJ97474.1               | 102-209              | 108                     |           |
| ClyO         | WP_258391128.1           | 1-157                | 157                     | [33]      |
|              | InsertG                  | 158                  | 1                       |           |
|              | WP_024417665.1 (R195C)   | 146-245              | 100                     |           |

Table S3. Analyses of genetic traits related to expression levels of chimeric lysins.

| Chimeric lysin                | RI   | Frequency of amino acid (%)                                        |                                    | Translation stalling codon pair <sup>c</sup> | Free energy <sup>d</sup> (kcal/mol) |
|-------------------------------|------|--------------------------------------------------------------------|------------------------------------|----------------------------------------------|-------------------------------------|
|                               |      | Low expression-related amino acid <sup>a</sup> /codon <sup>b</sup> | high expression-related amino acid |                                              |                                     |
| ALS2-dA-L21                   | 1.00 | 52.3 (11/21)/ 14.2 (3/21)                                          | 52.3% (11/21)                      | PP, PG                                       | -14.4/-213.2                        |
| ALS2-dA-L24                   | 0.35 | 50.0 (12/24)/12.5 (3/24)                                           | 50.0% (12/24)                      | PP, PG                                       | -16.3/-213.6                        |
| ALS2-dA-L25                   | 0.95 | 52.0 (13/25)/16.0 (4/25)                                           | 52.0% (13/25)                      | PP, PG                                       | -16.5/-219.2                        |
| ALS2-dA-L26                   | 0.93 | 50.0 (13/26)/15.3 (4/26)                                           | 50.0% (13/26)                      | PP, PG                                       | -15.1/-214.8                        |
| ALS2-dA-L27                   | 0.52 | 48.1 (13/27)/14.8 (4/27)                                           | 48.1% (13/27)                      | PP, PG                                       | -15.2/-213.9                        |
| ALS2-dA-L28                   | 0.76 | 46.4 (13/28)/14.2 (4/28)                                           | 46.4% (13/28)                      | PP, PG                                       | -16.3/-216.0                        |
| ALS2-dA-L31                   | 0.46 | 45.1 (14/31)/12.9 (4/31)                                           | 45.1% (14/31)                      | PP, PG                                       | -23.4/-222.7                        |
| ALS2-dA-L34                   | 0.23 | 47.0 (16/34)/11.7 (4/34)                                           | 47.0% (16/34)                      | PP, PG                                       | -25.6/-221.7                        |
| ALS2-dA-L35                   | 0.57 | 48.5 (17/35)/14.2 (5/35)                                           | 48.5% (17/35)                      | PP, PG                                       | -28.5/-227.0                        |
| ALS2-dA-L38                   | 0.33 | 44.7 (17/38)/13.1 (5/38)                                           | 44.7% (17/38)                      | PP, PG                                       | -29.6/-227.8                        |
| ALS2-dA-L25                   | 0.32 | 54.0 (47/87) 19.5 (17/87)                                          | 11.5% (10/87)                      | PP, PG                                       | -85.7/-219.2                        |
| ALS2-dA-ClyC <sub>SH3</sub>   | 0.40 | 54.0 (47/87) 16.0 (14/87)                                          | 11.5% (10/87)                      | -                                            | -66.0/-203.4                        |
| ALS2-dA-vB <sub>SH3</sub>     | 0.36 | 55.1 (48/87) 18.3 (16/87)                                          | 11.5% (10/87)                      | -                                            | -64.3/-197.8                        |
| ALS2-dA-tras14 <sub>SH3</sub> | 0.57 | 48.2 (42/87) 16.0 (14/87)                                          | 18.4% (16/87)                      | -                                            | -76.9/-210.1                        |
| ALS2-dA-ClyO <sub>SH3</sub>   | 0.64 | 44.0 (37/84) 8.3 (7/84)                                            | 15.4% (13/84)                      | -                                            | -81.7/-208.3                        |
| ALS2-dA-Lsp <sub>SH3</sub>    | 0.91 | 46.4 (39/84) 15.4 (13/84)                                          | 19.0% (16/84)                      | -                                            | -59.6/-187.5                        |
| ALS2-dA-2638A <sub>SH3</sub>  | 1.00 | 40.6 (35/86) 9.3 (8/86)                                            | 30.2% (26/86)                      | -                                            | -54.4/-187.3                        |
| ALS2-dA-2958 <sub>SH3</sub>   | 0.09 | 50.0 (40/80) 12.5 (10/80)                                          | 10.0% (8/80)                       | -                                            | -56.1/-184.9                        |
| ALS2-dA-L25                   | 0.29 | 50.6% (115/227)/16.7% (38/227)                                     | 13.2% (30/227)                     | PP, PG SH3                                   | -1.3/-219.2                         |
| Lysostaphin                   | 1.00 | 46.9% (116/247)/15.4% (38/247)                                     | 19.0% (47/247)                     | -                                            | -4.6/-214.4                         |
| Lsp-ClyC <sub>SH3</sub>       | 0.10 | 49.6% (124/250)/15.6% (39/250)                                     | 16.4% (41/250)                     | -                                            | -4.6/-224.8                         |
| ClyC                          | 0.17 | 47.6% (134/281)/11.7% (33/281)                                     | 19.9% (56/281)                     | -                                            | -3.6/-241.8                         |
| ClyO                          | 2.08 | 46.9% (121/258)/13.2% (34/258)                                     | 15.9% (41/258)                     | -                                            | -10.0/-245.5                        |

<sup>a</sup> The frequency of L, S, R, A, P, G, C, W, and I in linker, SH3 domain, insert gene and initial~16codon.<sup>b</sup> The frequency of AGG (R), CGU (R), CGA (R), AGU (S), GGU (G), AGA (R), UGU (C), CGG (R), CCC (P), AUA (I) in linker, SH3 domain and complete coding region.<sup>c</sup> Ribosome stalling codon pairs: RR (CGG-AGG, AGG-CGG, CGA-CGG, CGG-AGG), PP (CCA-CCC, CCG-CCA, CCT-CCG, CCG-CCG, CCT-CCT, CCA-CCG), KR (AAG-AGG), LR (CTG-AGG), PG (CCG-GGT, CCG-GGG), VG (GTG-GGA), and QD (CAG-GAT).<sup>d</sup> Predicted free energy of mRNA secondary structure of chimeric lysin by RNA fold. Partial regions: linker, SH3 domain, and first 16-dodons.

**Table S4.** PCR primers used for amplification of 10 linker candidates

| Primer name             | Sequence (5' -3')                                | Usage                 |
|-------------------------|--------------------------------------------------|-----------------------|
| P T7-F                  | TCGAAATTAATACGACTCACTATAG                        | IVTC/TL               |
| T term-R                | GAGGGGATCCAGATCTTGGGAT                           | amplification for all |
| P_gCHAP-L-F             | CTTTAAGAAGGAGATATACATATGG-<br>CATCATCTTTTAATCACC | Linker & SH3 domain   |
| P_gCHAP-L-R             | GTGATTAAAA-<br>GATGATGCCATATGTATATCTCCTTCTTAAAG  | SOE-PCR for all       |
| K <sub>SH3</sub> _T-L-F | GTTGCATGGGGTGTTTTCAAAAAGGGTCATCATCAC-<br>CATCAC  | Linker & SOE-PCR      |
| K <sub>SH3</sub> _T-L-R | GTGATGGTGTATGATGACCCTTTT-<br>GAAAACACCCCATGCAAC  | for all               |
| gCHAP_L21-L-F           | GCTATGCATTCATCCATTCTGCATCTACTCCGGCAAC            | SOE-PCR               |
| gCHAP_L21-L-R           | GTTGCCGGAGTAGATGCAGAATGGATGAATGCATAGC            | for linker21          |
| gCHAP_L24-L-F           | GCTATGCATTCATCCATAAAACTTCTTCTGCATCTAC            | SOE-PCR               |
| gCHAP_L24-L-R           | GTAGATGCAGAAGAAGTTTTATGGATGAATGCATAGC            | for linker24          |
| gCHAP_L25-L-F           | GCTATGCATTCATCCATGGTAAACTTCTTCTGCATC             | SOE-PCR               |
| gCHAP_L25-L-R           | GATGCAGAAGAAGTTTTACCATGGATGAATGCATAGC            | for linker25          |
| gCHAP_L26-L-F           | GCTATGCATTCATCCATGACGGTAAACTTCTTCTGC             | SOE-PCR               |
| gCHAP_L26-L-R           | GCAGAAGAAGTTTTACCGTCATGGATGAATGCATAGC            | for linker26          |
| gCHAP_L27-L-F           | GCTATGCATTCATCCATAAAGACGGTAAACTTCTTC             | SOE-PCR               |
| gCHAP_L27-L-R           | GAAGAAGTTTTACCGTCTTTATGGATGAATGCATAGC            | for linker27          |
| gCHAP_L28-L-F           | GCTATGCATTCATCCATGTTAAAGACGGTAAACTTC             | SOE-PCR               |
| gCHAP_L28-L-R           | GAAGTTTTACCGTCTTTAACATGGATGAATGCATAGC            | for linker28          |
| gCHAP_L31-L-F           | GCTATGCATTCATCCATTCTACTGTCGTAAAGAC               | SOE-PCR               |
| gCHAP_L31-L-R           | GTCTTTAACGACAGTAGAATGGATGAATGCATAGC              | for linker31          |
| gCHAP_L34-L-F           | GCTATGCATTCATCCATACTTCTTCTTCTACTGTCG             | SOE-PCR               |
| gCHAP_L34-L-R           | CGACAGTAGAAGAAGAAGTATGGATGAATGCATAGC             | for linker34          |
| gCHAP_L35-L-F           | GCTATGCATTCATCCATGGTACTTCTTCTTCTACTG             | SOE-PCR               |
| gCHAP_L35-L-R           | CAGTAGAAGAAGAAGTACCATGGATGAATGCATAGC             | for linker35          |
| gCHAP_L38-L-F           | GCTATGCATTCATCCATATGGACAAGGGTACTTCTTC            | SOE-PCR               |
| gCHAP_L38-L-R           | GAAGAAGTACCCTTGTCATATGGATGAATGCATAGC             | for linker38          |

\*Underlined letters indicate the sequence of gCHAP fragments.

**Table S5.** PCR primers used for amplification 8 SH3 domain linker

| Primer name                        | Sequence (5' -3')                               | Usage                                            |
|------------------------------------|-------------------------------------------------|--------------------------------------------------|
| ALS2-dA-ClyC <sub>SH3</sub> -L-F   | <u>GAAAAACCAGTACGGTACTT</u> GGTACAAACCGGAATCG   | SOE-PCR for<br>ALS2-dA-ClyC <sub>SH3</sub>       |
| ALS2-dA-ClyC <sub>SH3</sub> -L-R   | CGATTCCGGTTTGTACCA <u>AGTACCGTACTGGTTTTTC</u>   |                                                  |
| ALS2-dA-vB <sub>SH3</sub> -L-F     | <u>GAAAAACCAGTACGGTACTT</u> GGTACAAACCGGAAAAACG | SOE-PCR for<br>ALS2-dA-vB <sub>SH3</sub>         |
| ALS2-dA-vB <sub>SH3</sub> -L-R     | CGTTTTCCGGTTTGTACCA <u>AGTACCGTACTGGTTTTTC</u>  |                                                  |
| ALS2-dA-tras14 <sub>SH3</sub> -L-F | <u>GAAAAACCAGTACGGTACTT</u> ACTACATGGAAGAAAGC   | SOE-PCR for<br>ALS2-dA-<br>tras14 <sub>SH3</sub> |
| ALS2-dA-tras14 <sub>SH3</sub> -L-R | GCTTTCTTCCATGTAGTA <u>AGTACCGTACTGGTTTTTC</u>   |                                                  |
| ALS2-dA-ClyO <sub>SH3</sub> -L-F   | <u>GAAAAACCAGTACGGTACTC</u> GTTTCCTATCGCGAGAC   | SOE-PCR for<br>ALS2-dA-ClyO <sub>SH3</sub>       |
| ALS2-dA-ClyO <sub>SH3</sub> -L-R   | GTCTCGCGATAGGAACGAGTACCGTACTGGTTTTTC            |                                                  |
| ALS2-dA-Lsp <sub>SH3</sub> -L-F    | <u>GAAAAACCAGTACGGTACTCT</u> GTATAAATCTGAATCTG  | SOE-PCR for<br>ALS2-dA-Lsp <sub>SH3</sub>        |
| ALS2-dA-Lsp <sub>SH3</sub> -L-R    | CAGATTCAGATTTATACAGAGTACCGTACTGGTTTTTC          |                                                  |
| ALS2-dA-2638A <sub>SH3</sub> -L-F  | <u>GAAAAACCAGTACGGTACTT</u> GGTATAAAGCTGAACATG  | SOE-PCR for<br>ALS2-dA-<br>2638A <sub>SH3</sub>  |
| ALS2-dA-2638A <sub>SH3</sub> -L-R  | CATGTTTCAGCTTTATACCA <u>AGTACCGTACTGGTTTTTC</u> |                                                  |
| ALS2-dA-2958 <sub>SH3</sub> -L-F   | <u>GAAAAACCAGTACGGTACTG</u> GAAATTATACCGTCGC    | SOE-PCR for<br>ALS2-dA-2958 <sub>SH3</sub>       |
| ALS2-dA-2958 <sub>SH3</sub> -L-R   | GCGACGGTATAATTTC <u>AGTACCGTACTGGTTTTTC</u>     |                                                  |

\*Underlined letters indicate the sequence of gCHAP fragments.

**Table S6.** PCR primers used for amplification of various chimeric lysins

| Primer name  | Sequence (5' -3')                         | Usage                                                   |
|--------------|-------------------------------------------|---------------------------------------------------------|
| P_Lsp-L-F    | CTTTAAGAAGGAGATATACATatgGCGGCAACGCATGAAC  | SOE-PCR for<br>Lysostaphin                              |
| P_Lsp-L-R    | GTTTCATGCGTTGCCGCcatATGTATATCTCCTTCTTAAAG |                                                         |
| Lsp_T-L-F    | CTGTGGGGTACTATCAAAAAGGGTCATCATCACCATC     | SOE-PCR for<br>Lysostaphin &<br>Lsp_ClyC <sub>SH3</sub> |
| Lsp_T-L-R    | GATGGTGATGATGACCCTTTTTGATAGTACCCACAG      |                                                         |
| P_ClyC-L-F   | CTTTAAGAAGGAGATATACATATGCAAGCAAACTAAC     | SOE-PCR for<br>ClyC                                     |
| P_ClyC-L-R   | GTTAGTTTTGCTTGCATATGTATATCTCCTTCTTAAAG    |                                                         |
| ClyC_T-L-F   | CCTGGGGAACATTCAAGAAGGGTCATCATCACCATC      |                                                         |
| ClyC_T-L-R   | GATGGTGATGATGACCCTTCTTGAATGTTCCCCAGG      |                                                         |
| P_ClyO-L-F   | CTTTAAGAAGGAGATATACATATGGCACTGCCTAAAACGG  | SOE-PCR<br>for ClyO                                     |
| P_ClyO-L-R   | CCGTTTTAGGCAGTGCCATATGTATATCTCCTTCTTAAAG  |                                                         |
| ClyO_T-L-F   | CTTGGGGTACATTTAAAAAGGGTCATCATCACCATC      |                                                         |
| ClyO_T-L-R   | GATGGTGATGATGACCCTTTTTAAATGTACCCCAAG      |                                                         |
| Lsp_ClyC-L-F | GAAAACTAACAAATATGGTACTTGGTACAAACCGGAATCG  | SOE-PCR for<br>Lsp_ClyC <sub>SH3</sub>                  |
| Lsp_ClyC-L-R | CGATTCCGGTTTGTACCAAGTACCATATTTGTTAGTTTTTC |                                                         |

\*small case letters indicate nucleotides added artificially.

**Table S7.** PCR primers used for amplification of pET101/D/TOPO vector

| Primer name            | Sequence (5' -3')       | Usage                                     |
|------------------------|-------------------------|-------------------------------------------|
| gCHAP_CACC-F           | caccATGGCATCATCTTTTAATC | ALS2-dA-L25 amplification                 |
| K <sub>SH3</sub> -R    | TTTGAAAACACCCCATGCAAC   | ALS2-dA-L25 amplification                 |
| ClyC <sub>SH3</sub> -R | CTTGAATGTTCCCCAGGCAAC   | ALS2-dA-ClyC <sub>SH3</sub> amplification |

\*small case letters indicate nucleotides added artificially.

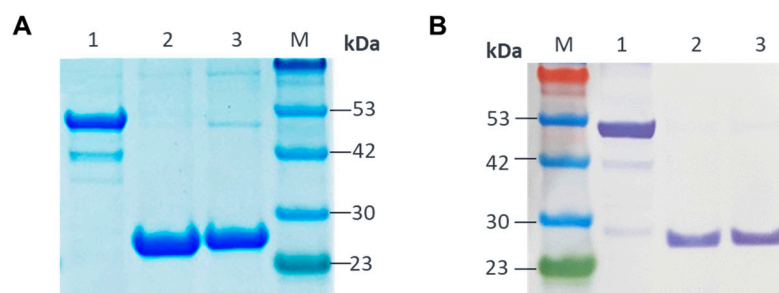

**Figure S1.** SDS-PAGE and Western blotting of *E. coli* expressed chimeric lysins. **(A)** SDS-PAGE analysis of purified protein using 4–12% polyacrylamide gel. Lane M: protein molecular weight marker; Lane 1: purified protein of ALS2; Lane 2: purified protein of ALS2-dA-L25; Lane 3: ALS2-dA-ClyC<sub>SH3</sub>. For SDS-PAGE analysis, 5  $\mu$ L of each purified protein, **(B)** Western blot analysis of expressed protein by six histidine antibody. The molecular weight of the protein inserted into the pET/D/101 vector is approximately 52.4 kDa and 28.31 kDa. Lane M: protein molecular weight marker (PM2700 ExcelBand™ 3-color Broad Range Protein Marker); Lane 1: Protein expressed ALS2; Lane 2: Protein expressed ALS2-dA-L25; Lane 3: Protein expressed ALS2-dA-ClyC<sub>SH3</sub>. For western blot analysis, 20  $\mu$ L of each induced protein.

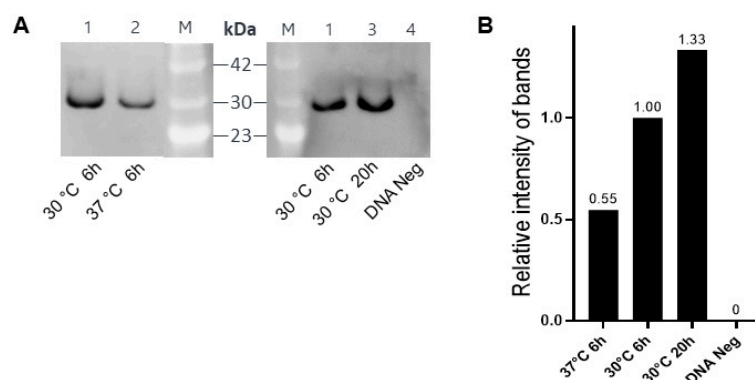

**Figure S2.** Comparison of expression levels of Lsp-ClyC<sub>SH3</sub> in different temperature and incubation times. **(A)** Western blotting of Lsp-ClyC<sub>SH3</sub> using anti-histidine antibody and ECL. Lane M: protein molecular weight marker; Lane 1: Expressed at 30°C for 6h; Lane 2: Expressed at 37°C for 6h; Lane 3: Expressed at 30°C for 20h; Lane 4: DNA-negative sample. **(B)** The relative intensity of the Lsp-ClyC<sub>SH3</sub> protein bands. The ratio of protein expression compared to Lsp-ClyC<sub>SH3</sub> expressed at 30°C for 6h was measured using Image J 1.53
